# Supplementary material for: One-pot preparation of multicomponent photocatalyst with (Zn, Co, Ni)(O, S)/Ga2O3 nanocomposites to significantly enhance hydrogen production
Source: Royal Society of Chemistry journal article supplement (doi:10.1039/d1nj02980k), 2021-01-01
Supplement: d1nj02980k1.pdf [file d1nj02980k1.pdf]

## Supplementary Information

### **One-pot preparation of multicomponent photocatalyst with (Zn,Co,Ni)(O,S)/Ga<sub>2</sub>O<sub>3</sub> nanocomposites to significantly enhance hydrogen production**

Hairus Abdullah <sup>a,\*</sup>, Riski Titian Ginting <sup>b</sup>, Anita Christine Sembiring <sup>a</sup>, Noto Susanto Gultom <sup>c</sup>,

Hardy Shuwanto <sup>c</sup>, Dong-Hau Kuo <sup>c,\*\*</sup>

<sup>a</sup>*Department of Industrial Engineering, Universitas Prima Indonesia, Medan, Indonesia*

<sup>b</sup>*Department of Electrical Engineering, Universitas Prima Indonesia, Medan, Indonesia*

<sup>c</sup>*Department of Materials Science and Engineering, National Taiwan University of Science and  
Technology, No.43, Sec. 4, Keelung Road, Taipei 10607, Taiwan*

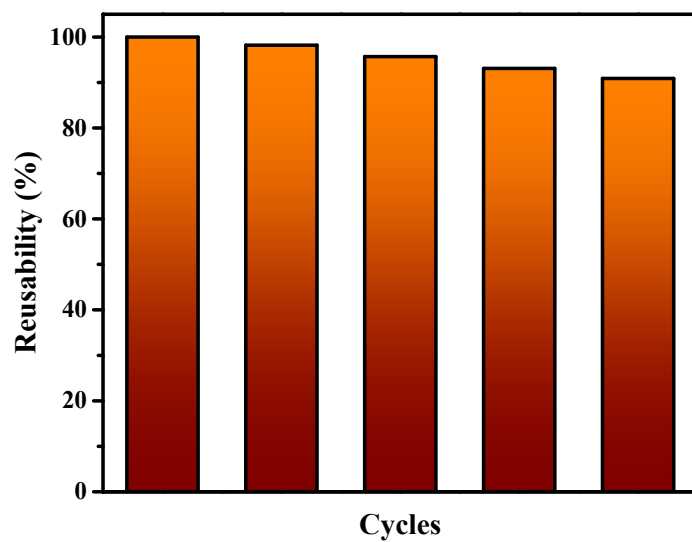

**Fig. S1** Reusability performance of ZNC-10G nanocomposite for five-cycle photocatalytic HER

**Table S1** EDS elemental analysis of ZNC-10G nanocomposite

| <b>Elements</b> | <b>Atomic percentages</b> |
|-----------------|---------------------------|
| Zn              | 39.97 %                   |
| Ni              | 0.86 %                    |
| Co              | 1.01 %                    |
| Ga              | 2.82 %                    |
| O               | 28.73 %                   |
| S               | 26.61 %                   |

The energy of single photon ( $E_p$ ) with wavelength of  $\lambda$  is calculated using the equation below:

$$E_p = h c / \lambda$$

where  $h$  is Planck's constant ( $6.6 \times 10^{-34}$  J.s),  $c$  is the speed of light ( $3 \times 10^8$  m/s), and  $\lambda$  is the wavelength of the incident light.

The total energy of incident light ( $E_t$ ) is calculated using the equation below:

$$E_t = P A t$$

where  $P$  is the power density of the incident light ( $\text{W}/\text{m}^2$ ),  $A$  is the irradiation area ( $\text{m}^2$ ), and  $t$  is the duration of the incident light irradiation (s).

The number of incident photons ( $N$ ) is determined by the following equation:

$$N = E_t / E_p = P A t \lambda / h c$$

The apparent quantum yield (AQY) is calculated by using the following equation:

$$\begin{aligned} \text{AQY} &= \frac{2 \times \text{number of evolved hydrogen molecules}}{\text{number of incident photons}} \times 100 \% \\ &= \frac{2 n N_A h c}{P A t \lambda} \times 100 \% \end{aligned}$$

where  $n$  is the amount of hydrogen evolved (mol),  $N_A$  is Avogadro's constant ( $6.02 \times 10^{23}$  /mol).

Based on the formula, the calculated AQY was 10.4 %.
